# Supplementary material for: Risk for Mortality in High versus Low Antiparkinsonian Therapy Dose During the First Year of Parkinson’s Disease: A Real-World Study
Source: PubMed Central journal article supplement — Adv Ther. 2024 Jul 8;41(8):3419–25. doi: 10.1007/s12325-024-02924-8 (PMC11263234; doi:10.1007/s12325-024-02924-8), 2024-07-08
Supplement: 12325_2024_2924_MOESM1_ESM.pdf [file 12325_2024_2924_MOESM1_ESM.pdf]

## Supplementary materials

### **Risk for Mortality in High vs Low Antiparkinsonian Therapy Dose During the First Year of Parkinson's Disease: A Real-World Study**

Yael Barer • Olga Sánchez-Soliño • Gabriel Chodick • Meital Grabarnik-John • Shiran Naftelberg Blonder • Neta li Feurestein-Ganor • Lars Bergmann • Connie H. Yan • Sivan Gazit • David Arkadir

Y. Barer • G. Chodick • S. Gazit  
Maccabi Institute for Research and Innovation, Maccabi Healthcare Services,  
Tel Aviv, Israel

O. Sánchez-Soliño • L. Bergmann • Connie H. Yan  
AbbVie Inc., North Chicago, IL, USA

G. Chodick  
Faculty of Medicine, Tel Aviv University, Tel Aviv, Israel

M. Grabarnik-John • S.N. Blonder • N. Feurestein-Ganor  
AbbVie Inc., Hod Hasharon, Israel

D. Arkadir  
Department of Neurology, Hadassah Medical Center and the faculty of medicine, the  
Hebrew University and Hadassah, Jerusalem, Israel

**Table S1** List of excluding diagnoses within the first 3 years post-PD first indication

---

| <b>Diagnosis</b>                                                                                                                                                      |
|-----------------------------------------------------------------------------------------------------------------------------------------------------------------------|
| Other degenerative diseases of the basal ganglia (atrophy or degeneration): olivopontocerebellar atrophy (Dejerine-Thomas syndrome), pigmentary pallidal degeneration |
| Degenerative disease basal ganglia (e.g., PD)                                                                                                                         |
| Shy-Drager syndrome                                                                                                                                                   |
| Progressive supranuclear palsy                                                                                                                                        |
| Multisystem atrophy                                                                                                                                                   |
| Secondary parkinsonism (e.g., parkinsonism due to drugs)                                                                                                              |
| Abnormal involuntary movements, abnormal head movements, fasciculation, spasms NOS, and Tremor NOS                                                                    |
| Neuroleptic-induced parkinsonism                                                                                                                                      |
| Secondary PD                                                                                                                                                          |
| Secondary PD (i.e., pyramidal involvement)                                                                                                                            |
| Medication induced postural tremor                                                                                                                                    |

---

*NOS* not otherwise specified, *PD* Parkinson's disease

**Fig. S1** Cohort selection.

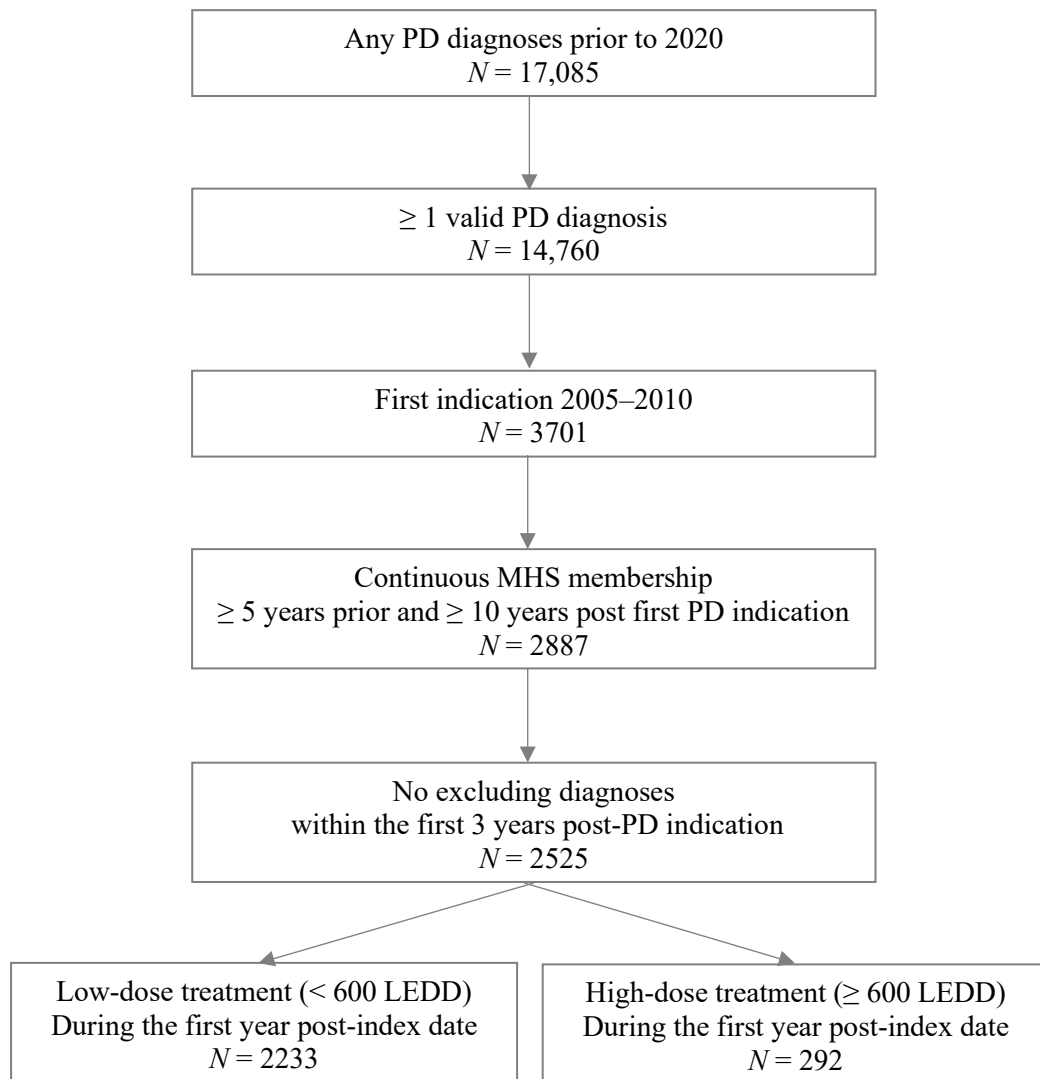

*LEDD* levodopa equivalent daily dose, *MHS* Maccabi Healthcare Services, *PD* Parkinson's disease
